# Supplementary material
Source: publisher figshare collection journal article supplement (https://frontiersin.figshare.com/ndownloader/files/15517274)
Supplement: Supplementary file 1 [file 15517274]

**Yu *et al.* Supplementary 1**

**Supplementary 1.** Sequences information of microsatellite markers in GFP transcriptome data.

Unigene038721

AGCCCCTTTGGTGGGCTTGGTCCATATGAGTAGGGTTCATCTTCTGAATAATAATAATAATAATAATAATAATAATAATAATAATAATAATAATAATAATAATAATAATAATAATAATAATTCTGCCAATGGAAGTCTCTTTCTTTTCATCTGGAGTGTGATTTTTGTATGGGAGTCAGTTCGATGGAGAGCTTTGGCTGCAAATTGTGTCAGTTGGGAGAGTTTTTTTTTGTTTACGCAGAACACATCAGTTTTTTAGGCCCAGAAGATATGTCAGTTTCAGTGTTTTTTTTTCCCAGTAGAACTCACAAGAGTAGAGGTTTATTATTCTCTTGAAAAATCTGGATATAAAGATGAATACTGCGTCAAGAATAAGACAAAAGATCAAGATACAGAGTGGGCTAAATCCTGACAAAAAAAAAAAAAAAAAAAAA

Unigene082899

AAAAATTCTCCGTGACTTACAGAAATAAGTATACGACACTGTGACAAACATACACATACACACATACAGCGCTACAACATAAATCTCAATATACAGATATATTTTGACCAGCTTACCACATTCATCAAGAAAACATAATATTCACATCCGTAAAATATTCCCCCTCCCCTCCCATAAATTGAAATGCCCACAGTCTTTATGTAAACACCTCATCCCTTCTTGAGTTCTGTGAGATGATTTCTGCTGTGAGGGCAGTTGACAATGGTAAAGTAGTCCTGCATTAAGAAAGAATTATGTGTTTCTCTCGTCCGGTGAAAGAAACCAAGGATATGTTAAGAATGCTTCAGCTTTAATTAAGCTCTGTCATCGGTACTGCTTGAAGAAGAAGAAGAAGAAGAAGAAGAAGAAGAAGAAGAAGAAGAAGAAGAAGAAGAAGAAGAAGAAGAATCTCTAAAAAAAAAAGTCCAAAGCGACACCTGTGTTACTGTAT

Unigene032300

TTACTTTTCAAACTATTAACGTAATGATTTTTGTGAAGTCTTACTTTTTAATAGAAATATAATGATTTTTGTGAAATTCTCGTTTTGGATATTCAGTATAATGATTTTTGTGAAATCTTACTCTATTTATTATTAAATATAATAATTTTTGCGAGGTCTTACATTTTTATTGTTACTAAATAGACTTTTCTTAAAGTTAGCCCACTTTTTCAGGGAAGCAAAATGATAAATTTATTCACCGTGATTCTTTACACTTGTGTTTTGATAAAGTTATCTTTTCCAGAGTCTCTGGAACTCAAGACTGGATTTTCTGACATTGCTGAGGCTGCAAAACAAAGGCTACACTCCAGTTTTGGCTGAATAACCAATTTGGCTGAAGAGGTGAGGTTCCACTTCGGTTTTCCCCAATTTTCTCCCGCTCAACCAAACCAATGATATTTGTTTTTACCAAAAAAACCAACCTCTTGACACGATTCTCTTTCAGGTAGTAAGGGCGCTGTTCTCCTTGCAAGTTAATACAGTTTTATCTATTTATTAATTGATTTTTTCTTTTTAATAGGTGAGATCTGTTCTGTGTATTTCCCTTTACCTTCTTTTACTTCCTAATGAGCACCACATTCTTAGGAAACTTGAATTTCAAGTCCATGTCCTCTGAGGGCTTCTTCCATGTGAATAGGTTTTATCTTCTGGATAATAATAATAATAATAATAATAATAATAATAATAATAATAATAATAATAATAATAATAATATTTCCCTTTACCTTCTCTTACTTCCTAATGAACACCACATTCTTTGGAAGTTTAATTTTTGAGTCAGTGGCCCCTTTTT

Unigene001327

TTCGACATGCTTCAGCACAAAGAACATTCAAATAAATTGCGTGGAATGATGTACAAAATTGTGCAACCATTAACTCAAGTACATAAACATCCTACATGAGTTAGAAATAAAATGATCTAATAACCCAACAGAAAGGTAACTGATACCGCTTCTTCCGGGACTTGGCACATGGCCGACATGAGCGACATAGCAGTTGTCTCCCAAGCCGGTCCCTTCGGCCGCGTAACTGTCTCCCTGAATTTGTCACCCGATTCGAGAGCGAGTCCCTCGAGCGAGCCGGTGAAGTCTCCGTATGCAACTGCGTGATCTCATTAATTGTTAACGATAATAGGAGTAATACTAATCTATAATAATAAAATCCTAGTGATCTTTTTTGTTTGTCTGTCCTGGGTGGGGGCGGGTCAGGTAGGGGATCGGGAGGGTAGCGGAGACATGACACATCCACCCTCCTCTTGCAAACCTGTTTGTCCGCCCCGGGTAAGGTCGGGGTAGTTAAGGGATCGGGAGGGTATTGTAGCGTAGCGTGCACCACCAAGCTCATAATAATAATAATAATAATAATAATAATAATAATAATAATAATAATAATAATAATAATAATAGTAATTGGGGAGTCTTTTTCTATTGGTCCTTTCTGCAAGG

Unigene041668

CTTGAAGCCCGGATCACTTCGCTTCATTCCTTTGTTCTGCCATTCTCCTCCAACTGTTGCAAGGAAAAAATAATGTACATTACTATACAGTATATAAAAATTTCAACTGATATAACCATATTAATGTAGGATCTGACACAAAACTACAATAGGACAAATCGTTTAAGTCCAAAGGCAGTAATAGTAAACTAATACCTTTAAATAGAATAGAATAGAATAGAATAGACGCAGACTCGTTCCAGTAAAATAGGAACAAATATTTTGAATCACAAAGCACTGACTCACATTCACTGTCCTGTACTTACCAATATGTAAAGGATAATGTGAAAACTTTTCAAAGATACAAGACAACTGTTCTTTAGAGCCAACTGCCAGGGGCTTCAAGAGACAAGAAAGAACAACTACACATGGTATCTACAGACAAACAGCTCCCTATCTGTGCTGTACATGGACACAAAGCTCAAGCTGGACAGCACGGCCTTCACTTCTAGCTTAGTCGTAAAACCAGCGTTCTTTCCTATAAATAAATGTCTCGCTGACAAAACTGGTGTCCATTACAAGCCTAGTAACTGTCAAGGGTTAGTATTGCAAGTGAGTTGAAACAGTGTTTACAAGCACAGTAGAGTAATAATTTTTATACTAACTATGTTTCTATTCTCTTTAACCTAATTTGCATTATTCATATTTCCTGACTACTTTTTGAATACTACATTACAATATGTCTCATGTAACCTAAAAGTGTTGTGAAACAGCATAAAATTAGTGCCAGTATTTTCACTAAAGTCAGTCATTCAGCTGTATAAATTTCACTACCTTCACTGCTTTTTTCTTGTCTCATGATATGGGCTAACCTTTCTGACGCGAGTACAAATAACCTTACATCCACCATAAAATCCTTAACCTTTCTCTACTTTACTTTACTTTACTTCAGCGTATAAATAATTAATAACCATCCCATTTTCCACAATTACACAGGACCAGACAAGAAGGAGGAATAAATGAGAACCTGGCAACCAAAATTTAACAAGCCTCTGTGGAAATAAAACCCCACTGAGACAACTTCAAAAAGTTCCCCTCCTAGTGGAATTTTTTTTTTTAACTACATCTCTGATGACAAATGGCTAGCTTTACGACTCTTAACCACTGTAGAAAGAATAGTTCAACAATTCTAAACACAGGAAATTGGAATGCATTACACAATGAAGTCTACAAAGGAACAGACCAATGGATTGTACTAAATTTGGAGCCACATGAGAAATCAACAACAAAGGCAACCTATGTAAGAAAGTAACTACACAAGAACGGTAATATGTACACAGGTAGTTATACAATGTATCTGCGGATCCTGAAAAACCATTTAACAGAGCATCTAGACAGCAAGT

Unigene018861

TATATATATATATATATATACTGTACTTGGATTCAAAGACTGAAGACACTTTTGTACTCCGAAAGAATACTTCGAGTTTCAGATGTAATTATCTTCATAGCAGACAGACACTGTCATGAGGACACCGTTGAGGATGGGTTTACCAGCAGTCAGTGATAATACAGGGAGTGGAAGATTCGCGTAAGTATTTGGGAGTGAATATTTTGAATGATGACAGGGCGAGAAAAGAGGGAATCACAGGAATGGTGCAAGTGAGGAGGGTAGCAGAACGAAGTGGCAAGTAACGAGGAAATCTGGAATGTCTATGGAAAAGAAAGCGGGACTGAATAAAAGGACTAGAAAGGCGCTCTTCTGTGGAAGTGAAGTGAAGTGAAGTGAAGTGAGGTGAAGTGTGGGTGTTGAGAGAAAATCAAATGGAAAAAGTGGAAGTTGTAGGGATGATGATTTCGAGGAGAACGGTTTAATATGAGCGAGGTGAAGCTAGTTGAATGATCAAAAACATTTACTTTCAAGCTCAATGGAATTACCTGTAACGGAAAGAAATGTGGACATTTAAAATCGGCAGAATCAATCTGTAAAACTGGTTGGTGAAAATAAAGGTCTCTGGTGGAACTTCAAGACTCACAATGAAGTGGATGTTCCATCAACAAGAGAACCTACATTCATTAACCGTTATTCTCTCTTATTCCGAAACATCCGAAGAGCTTGCAATCCATTGCACAAATGTTAGAAATTGTTAATACAAGGCGGTTACAATCACTGATAAACATTAATGAATTTTCCTCGTATCAGTTTAACTAATTTAAAGAAACACTCCAGTAAACTAGACTAAGGGATATAGATTAAAATATTTGCTTGAAGAAATATTTAAATATTCGTTTGAAAACGTTGCTCTGAGTAATGTTAGGGACATCTATCCTTATACGAGGAATAAACGAATACATCACAATATTACATTGTGCGAGGGTAACACCAGTCTTACTGTAGTATATTGGCCCA

Unigene034642

ACCTTGAGCGGGTGGAGGACGGCGAAGTAGCGGTCCAGGGAGATGCAGACGAGCACCATGGACGACATGTAGAAGCCGAAGGCCGACAGGAACTTGTAGACCTTGCAGCCGACGTTGCCGAAGACCCACTCGATGGTGATGTGCCACGTGATCTCCGTCGGCAGGAAGACGAACGTGACGATCATGTCGGCCAGGGACAGGTGCATGATCATCATGTTGACCCGCGACTTCCGGTGGCGGTTCCTGAAGAGGGCGACGAAGACGACCAGGTTGCCGACGGCGGCGAAGGGGAACAGCAGGGAGTAGGCGATCAGCTGGGTCCTGTTGATGTACTTGAGGCCCTCCGGGATGTAGGAGGTGAAGTTGGTGCCGTTGGTGTCGTTGAGCAGCATGGCGTCGTCCAGGTCCATCGGCTGGTAGTCGCTCAGCAGCTGCTGTTGCTGCTGCTGCGTCTCCGTCGACAGGTACTGAGGAGGGCTCCGGCCGTCGAAATCCGACGGGTGGTCTGGCAGGTCCAGCAAGCCCGGCCGATCGGAGCCGCCCAAAACCGCATCCAGGGATGTGGTGTTGGCGGCTAGGGGGGAAAAGCTCATCATTTGGCCGCTGTACATGGCGCCTTGTGGGCCGAATGGGGTCACATTAGGTCACGTTAGGAGCCTGGTATGGTAACGGTCCCCATCGTCTTGGCGGATACTATGAAAAGGTCTGAGTCTGAGTCTAGGTCTAGGTCTAGGTCTAGGTCTAGGTCTAGGTCTAGGTATAGGTCTAGATCTCGATCAAGGTCAAGCACTGGCGGCCCCACTACACCATGAAGAGTGAAGAAGTTCCTCCTTCAGACTCTCCACTTTGGACATAAAACTGAGCACAAACCGTGACCCGGGAAGGGGCTGGGGAATCCTTATGTCGCGAGACCAGGATTGCAGGCTAGCAGGATCGAAGCTTTATCCTGGGTATGAAACCCCAGGCAAGAGAGTCCTATCAGGCCCGAGAGAGACGTCCTTCACACCGAGCGAGCGCTAATCCTTCACTCCTGTTCATTAACCTCATCTCGTAATGCGGGGGAAGGGGGGAAGGCGGGGTGGACCTTTCTGAAGATGGAGAATCTCAAAAGTAGGTGCTTTCCCATAATAGTAGACGGTAGCAAGGACTTGTCTATTACACACAGGCCTAGCCCATCTTCTTGACACTAACTGAGGTAATTACGAAATATTCGGAACACAAATAAAACATAAATCCTGAGAACGGTCACGGCACAACGTGTTAATTAACGAATGCGACCGACTCGGAAGTCTGCA

Unigene041463

GAAGGCGGCAAGATTTAAGCCCGAAAAAGAAGCCAGAGCCAATTGGTTCACCCACTAGGCGCACTCCATCCAACAGGGAGCCAATAACACCAAAAGAATCACCAAGACGTGCTCCAAAACCCGTCAACACATCTCCACAAAGAGTTCCTAGCTCACCAAGACGTGGGCGATCTCCAAATAGATCTGGAGTATCCACACCTAGAGAAGTTACACCTACTGGTCGCCAGTGTTGTAAGAGACACAGGGAAGCAAATGCAAATGCAAATGCAAATGCAAATGCTCCAGAATGTGTAAGCCCAACTAGAACTCAGAAGTCTCCTAGATCAACAGTTCCTACTAGTAAGAAACCAGGTTCACCTGAGGGCAAACCTAGAATGAATGGTGATATTAAACGTGCCCCTGAGCCCAGAATGAATGGCGATGTTAGCAGGAAGCCTGATGATAGAACTTCAAGAACAAGAAGGCCTTTGGATAGGACAAATGAACCAGAGAAGACTTCAACTCGCCCATCAAGGCTTAATCAATCACCAAGAAAATCTCCAACATCAAAGTCACCAGAAAAGCGAGAGCCCACCCGACCTCTGTCCACAAGAGGTAGTGATAAGAAAGTTCCAAGCAAATCTGTTGACTCAGAACCAAAAGGAAAACCAAAATCATCACTGAACATACCAGATCCAGCTGATCCTGTTGTGTCACTTCCAGAGACACCAATGACTGAAGGAAAGAAGCCTCTTCCAGTAGATGATGATGATGACCTTGTCATTGAGGATGTTTCCAATGAACCTGATCTGCCTTACCATAAAATTCATCGTCCATCCCTTGTCCGTGAACCATCAGAGTACCCAGATGTAGATGGTGAAGGTGAGCAGCCTGATGATGCCTTTGTTGAAGAGTCTCCTGATGAGCGTGATGAGAAGGAACCTGTAAAGGAGGACATTGTAAAGTCAAGAAAGCCAAAGCCTTTGGAAAGCCGACCAAGTGAC

Unigene036095

AAATAGTCCATCGAGATGTTAAGGTATCAAATCTCTTACTCACTAACACTGGCACCATAAAGATAGCTGATTTTGGATTAGCACGAGAGTTAGGGTATCCAATGTCTCCAATGACACCACAAGTTGTTACACTGTGGTATCGTGCTCCAGAGCTGCTCTTTCAGGCAAAGACTCAGACAACAGCAGTTGATATGTGGGCAGCTGGCTGCATCTTAGGTGAACTTCTGCTACACAAACCACTACTGCCAGGCCAGTCAGAGATTGATCAGATAAACCTCATTATAAATTTGCTGGGAACACCTAATGACAACATTTGGCCAGACTTCTCTCAGTTACCTGCGATACAGAGTTTTACATTAAAGCAGCAACCATACAACAATTTAAAGACAAAGTTCCCAGCATTATCACCTTCAGGCCAGAGACTTTTGAATTTCCTATTCATGTATGACCCAAACAGAAGAGCTACTGCTGATGAATGTCTCAGTAGCTCATATTTTAAAGAGCATCCACTACCCTGTGACCCGCAGATGATGCCGACATTTCCTCAGCACCGTAACCTCAAACAACACCAACACCAACACCAACACCTGCACCAGCACCAGACATCTTCTCAGGCTACTAGTATAACCCAGGTATTAAATCAACAAATGCCATCTTTATATACAGGTGATCGAATGAGCGAGGGACTGTCCACTTCAAATATAGGAATTGGAGAACTTCTTAATTCCCTCGCTAGGAAGTGAGATGTCTAATTTAGTTACTTTTCTTGTTGAATATATAAGATGAAGTTTTCATTTGGATTTTATGTTTTGTGGAAACTGAAAAAATTTGGAAATTACAGTTTAAAATGATTGTCATAATTTTATACATGTATCTAAGCATGGATGGAAAACTGGGTTTAGCTTAGTTTTTATCAAAATGATAGCTCGTAAGTGTTTTATAACCTCAGTAGGGTTTGCAGGAAAGTGAAAAATAACATTTTAAAGAGAACAAATAGAAAATAAGGTTATGTGATCCACAGTTAAAAAGGAATCCATGGTCTAAACTAATAAGAATATAAAAAGGATGTGTTACTCTTGGGTTGGAAGAAAACTGGAAGGATCCAATGGCATGAGAAGCCAGCGAACAC

Unigene001885

TAGACTCAGTGAATACTCCGTTTTAAAACTTGTGTACGTCCGTCCCGTATACTTTCGTTTATATCGCCTGCATCTGGGAACTCTTGTTTTATAATCAAAAAGAAGGAACATAAGTGAATTTTGTTTCGTTAAGCTCGATCGGGAACTCTGACGATTTTGCTGGACGGAAGAGTTGATAGACACTACAGTTCAGAAAGAGAAATTTTAGCTAATCCAATCGCTGCTTCAACAAGAACAAACACTCTCGGTTGAATAGCATTCAACCACAACAGCAGCGACAGAAGAAGAAGTAACCAGCAACCAGGAGCGATTCTCAGTAACGTGTGTGAGTCAGCCCTCGGCGGAGAGAGAGTGAGTCACAACAGGCAGGCAACTTGGGAGTGCGCAACCACCTTCTCTGTCGGTCCGCCACTCACTACCTCGTCTGCGTCGGCGCGACACAGCCGCACATTGAGCTCGCTGAGAGTGCTAGTAGTAGTAGTAGTAGTAGCACTAGACCCAGTCCCGTCACCTATAACCGCTCCTCCTCCTCATCTGCCTGACCGAGAAAGATCGTGAGAGAGAGAGAAGAAAAGACGGCTCGTTTTTGAGTTGAAGAAGAAGAAGAAGAGACCACCAACCAGCCAGCCCCGACCCTACCCTTTTTCCGTAACCTTTCCGGACATTGCGAGCATAGTGAAAGAGAGAGAGAGAGACTGCATGTGAGCAGGCATGGCTTGGAGTGCGGACACCACCTTCCTGGACCTTCATTCGCTGGTCACCCCAGGTCTTGACAAGTCGTTCAGTCCGCAGACGTTTAGCGGGCGACGCCAGTCACCTCAGCCTCCCCATCCCCACCTTCACCAACACCAACAGCAGCAGCAGCAGCAGCAGCAACAGCAGCAGCACTTTCTGCAACAGCAGCCCCACCAACAGACACAG

Unigene015914

AGGAGGAGGAGGAGGAGAGAAATGCAAACACCACCAGCACTGAGCACCACAGCACACCAACAAATGTCCGTGCACAGACAAAAAGGAAAAGACGCACAGACAACGACCGTGGCGATATACGAGCCCGAATCGAAAGAATGCAGGCAGCAGGCAGCAGGCTGGGCAGGCTAGGCAGCAGCTCCGTAGCAGCTATAATCTGGTGCTGCTGCTGCTGCTACTACGGTACTATACTACTTCTACTACCGGACTTCGTATGTGTGTGTGTGTGTCAGGGCCACGAGGCGATTGGAAGTCTCTGTTGTGTTTGTACGAGAGTCTCTTTCTCTCTCTCTCTCCTTTCTCTTTCTCTCTCTCGCTCTAGCTGCTTTCTTCAACTTCTTCTTGAGAGGATCTTCTCCTCTCTCTCTCTCTCTCTTGCTCGCTCGCGTCTTCGTCTTTTCTCGGGGCAGCCACCCTCACTCACACTACCATCCCG

Unigene044258

CGCGAGCGTGTTGGCGCCCTCGCCTCGCTCGCCCGCTTTTCTCCCGACGCCAATTCTTTCCTAGACCCCAAATCCTATCAAACAATCCTAATTAATAACAGGGAAACGAAGGAACCGCGACGTGAAAATAGAAGGAAAAAAAAAAACTTTGTACGCTGGCTTCGAATTTGGCGCGACGACTCGCTGGCGTGAGCGTGTGGAGAGGGCGGCCGTGCCTGTGGACCCCGTGGACTGTTATGGTTTAAATCCAACATGGCCGCCTCCTTCTTCTGTCGTCGCCACTGATGAGAGTGAGAGACAGAGCCCGATATTTATCCCCGCCGTGTTGACACACAGACGTCCGTGCGCGCGTGAATGAGAGAGGGAAAGAGAGGGAGAGCGCCGCACAGAGAGACAGGGACGCGCCTGCCCCGGGAAACGAAGGAGGAGGAGCAGAAGGACAAGCGAAGAGAGAGAGAGGGAGAGAGAGTTTGTGTGTGAGAGTGTGTGTCTTCTGTGATCTTTCTCTCTCCGTCGCCGTCGTCGCCGTCGCCGTCATATTATTATTCTCCTCTCCCTATCTATCTCTCTCTCGGTGGTTAAAGTCGCTCCTTCGGCAGGAGAGAGAGAGAAAGAGACCCCGAATGCCTCGTCGGGAGGAGGAGGAAGAAGTCGACAGCAGCAGCACCATCAGCAGCGGCCACCGCCGCCGCCGCCGCCGCTTCTCTTTGTGGTGTTGGTGAAAGGTTCCGCCGACGTTATTATCGTTATTCCCATTATTCATCCCCCATTCCATTCGTCCTCTCTCTCTCTCGCACTTTCTCTCTCGCACTTTCTCTCCCACACGAACATGACCGGACCAGTGAAATAGAGTTGGAGTCGTCGAGTGAGAAACCCTCCCTCCCCCCCTTTCTCTCTCTCCTGTTGTTGTCGCCCCCTTTCCTCTC

Note: Blue nucleotide sequences stands for repeat motif of SSR.
